# Supplementary material
Source: MDPI journal article supplement (https://www.mdpi.com/2071-1050/13/4/1813)

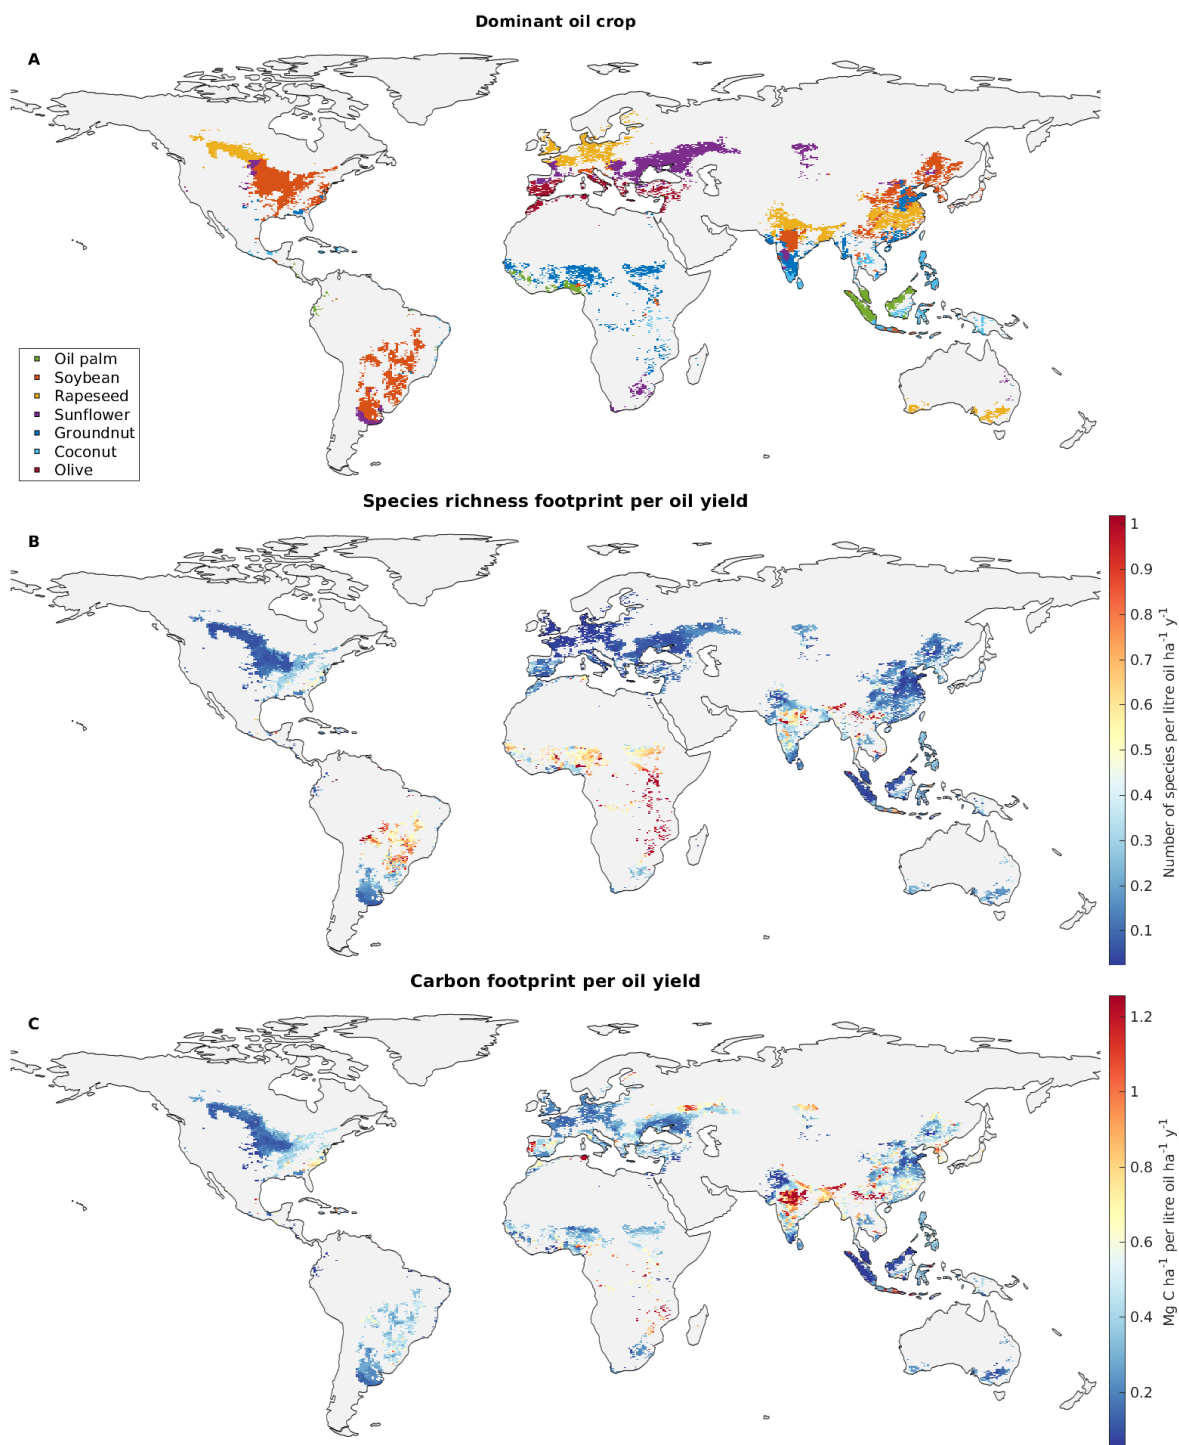

**Figure S1.**

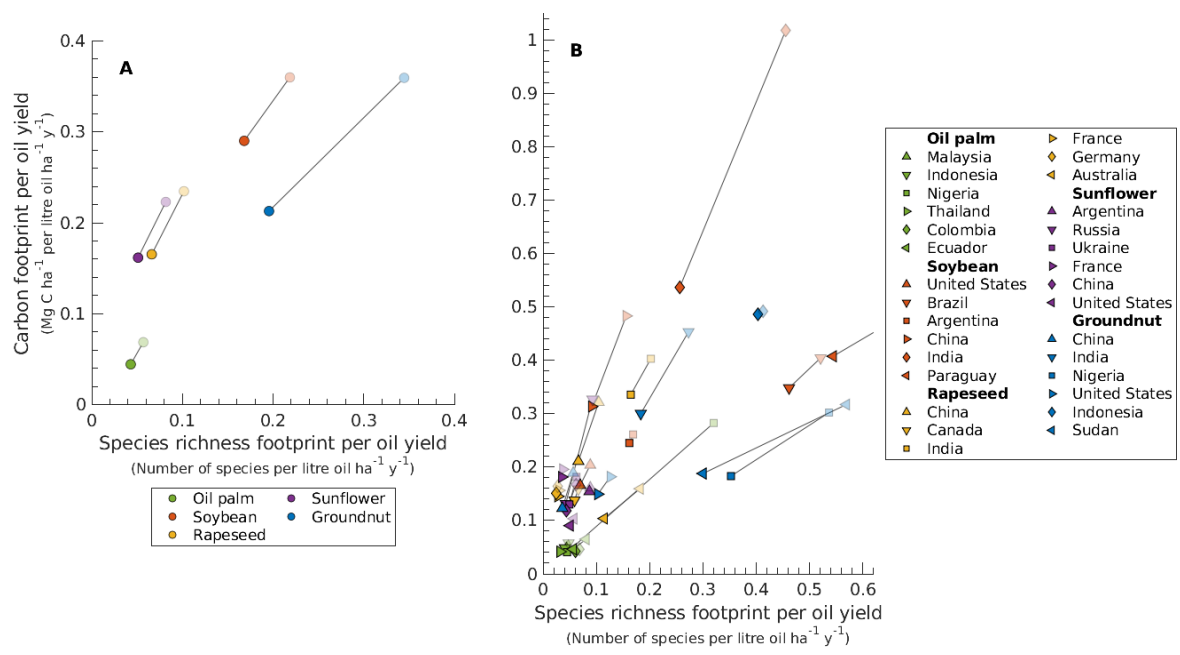

Figure S2.

Supplement: s1 [file s1]
